# Supplementary material for: Gaseous microenvironmental remodeling of tumors for enhanced photo-gas therapy and real-time tracking
Source: Royal Society of Chemistry journal article supplement (doi:10.1039/d0bm02026e), 2021-01-01
Supplement: d0bm02026e1.pdf [file d0bm02026e1.pdf]

# Gaseous Microenvironmental Remodeling of Tumors for Enhanced Photo-gas Therapy and Real-time Tracking

*Yuchu He<sup>#1</sup>, Cong Cong<sup>#1</sup>, Shuxian Zhao<sup>#1</sup>, Zhuo Li<sup>1</sup>, Desong Wang<sup>1</sup>, Jianmin Gu<sup>1</sup>,*

*Lanxiang Liu<sup>\*2</sup>, Dawei Gao<sup>\*1</sup>*

1. State Key Laboratory of Metastable Materials Science and Technology, Applying Chemistry Key Lab of Hebei Province, Hebei Key Laboratory of Heavy Metal Deep-remediation in Water and Resource Reuse, Yanshan University, Qinhuangdao 066004, P. R. China
2. Department of Magnetic Resonance Imaging, Qinhuangdao Municipal No. 1 Hospital, Qinhuangdao, P. R. China

\*Corresponding author: Prof. Dawei Gao, Tel: (+86)13930338376.

E-mail: [dwgao@ysu.edu.cn](mailto:dwgao@ysu.edu.cn)

#: Yuchu He, Cong Cong and Shuxian Zhao have the same contribution to this work.

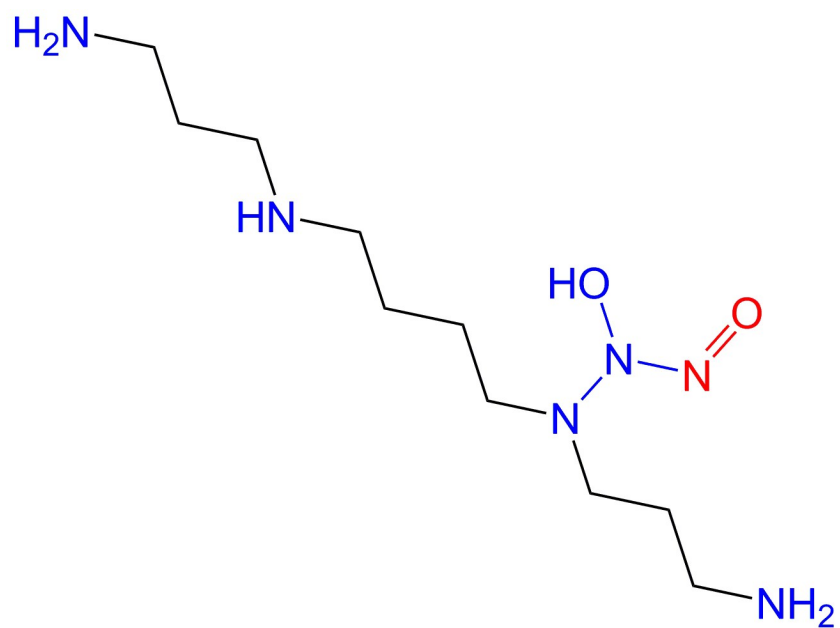

**Figure S1.** Molecular formula of NONOate.

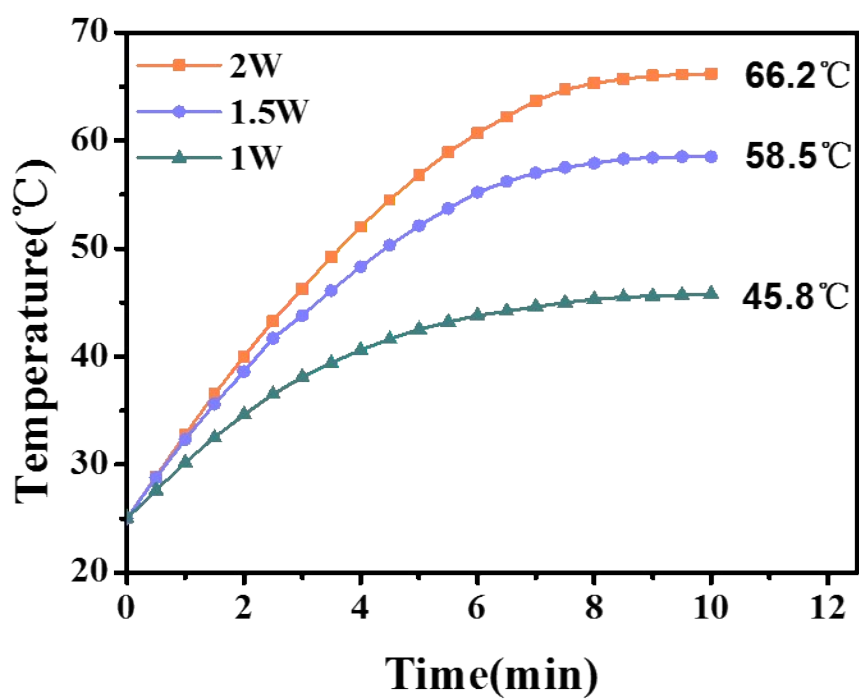

**Figure S2.** Photothermal effect of PINMH with 10-min laser irradiation (1 W/cm<sup>2</sup>, 1.5 W/cm<sup>2</sup> and 2 W/cm<sup>2</sup>)

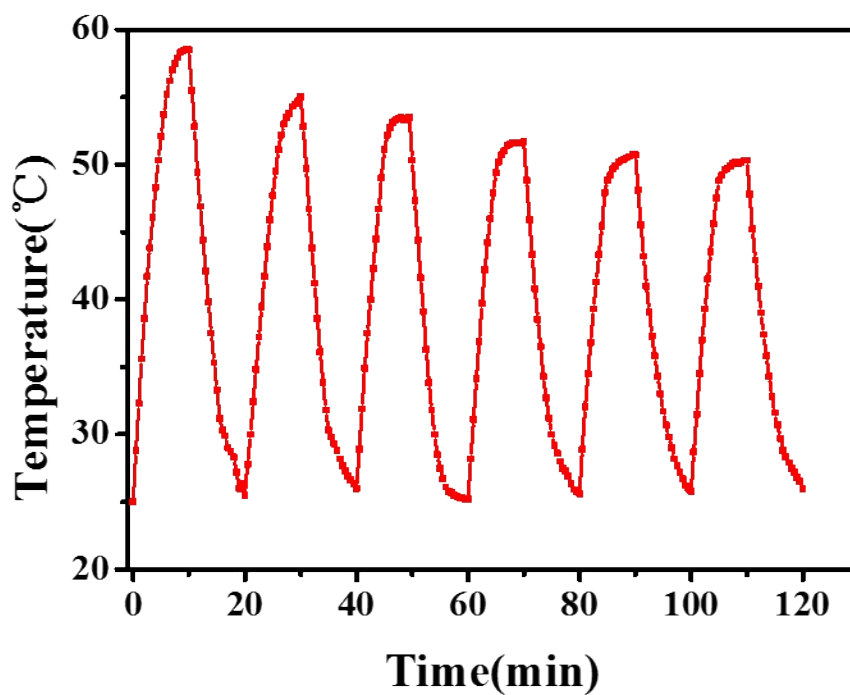

**Figure S3.** Photothermal stability of PINMH with laser irradiation (10-min On and 10-min Off, six cycles)

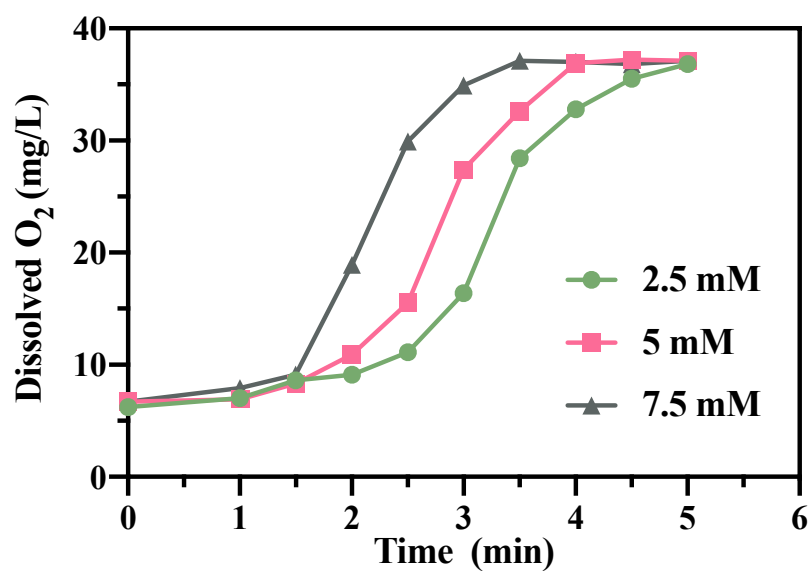

**Figure S4.** O<sub>2</sub> content produced by H<sub>2</sub>O<sub>2</sub> (2.5 mM, 5 mM and 7.5 mM) catalyzed by PINMH.

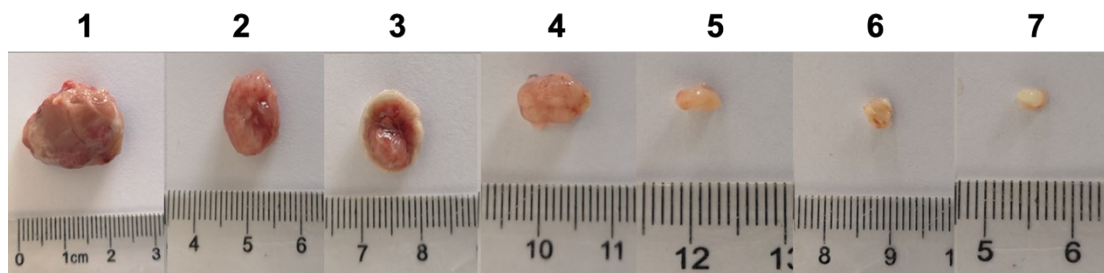

**Figure S5.** Photographs of tumor treated with all tested groups (1: Saline, 2: PDA@ICG+, 3: PDA@NONOate, 4: PIN+, 5: PIM+, 6: PINM+, and 7: PINMH+).

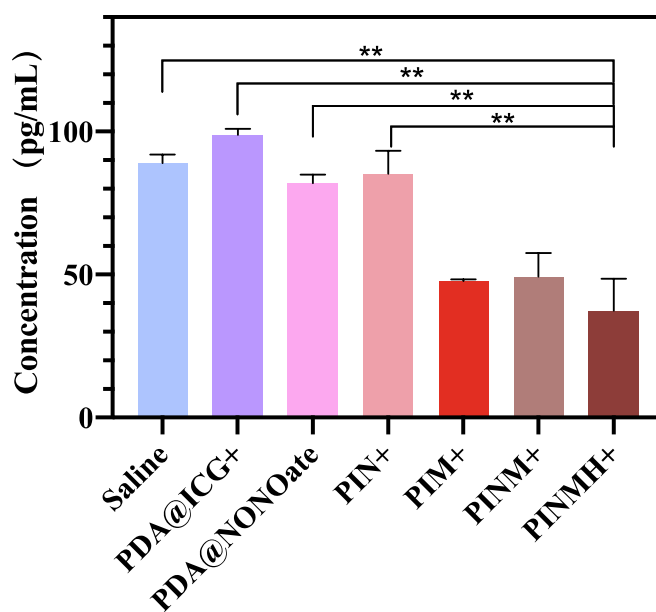

**Figure S6.** The expression of HIF- $\alpha$  in tumors of mice with different treatment.

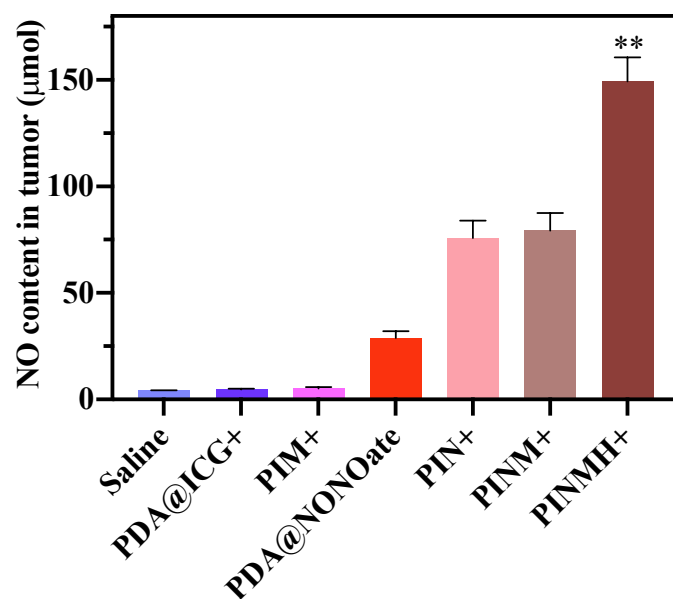

**Figure S7.** NO content in tumors of mice with different treatment.

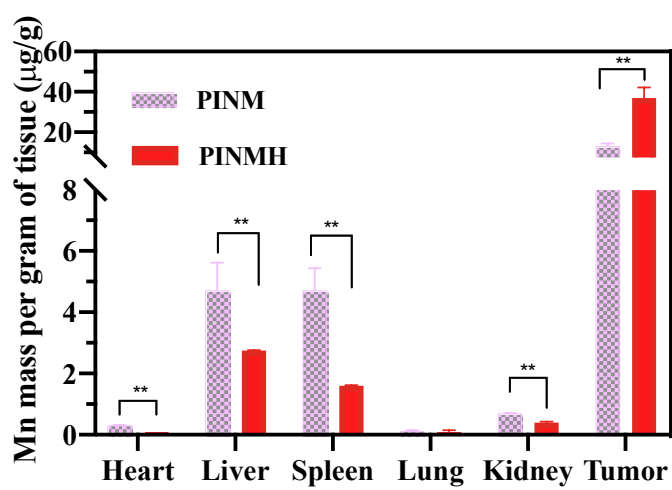

**Figure S8.** Biodistribution of PINM and PINMH in mice at different treatment after 12 h of injection.
